# Supplementary material for: Impairment of Granzyme B-Producing Regulatory B Cells Correlates with Exacerbated Rheumatoid Arthritis
Source: PubMed Central journal article supplement (PMC5491972; doi:10.3389/fimmu.2017.00768), 2017-06-30
Supplement: image_1.pdf [file image_1.pdf]

## Supplementary Material:

### Impairment of granzyme B-producing regulatory B cells correlates with exacerbated rheumatoid arthritis

Liling Xu, Xu Liu, Hongjiang Liu, Lei Zhu, Huaqun Zhu, Jian Zhang, Limin Ren, Pingzhang Wang, Fanlei Hu\*, Yin Su\*

\* Correspondence:

Fanlei Hu: fanleihu@bjmu.edu.cn

Yin Su: suyin0921@163.com

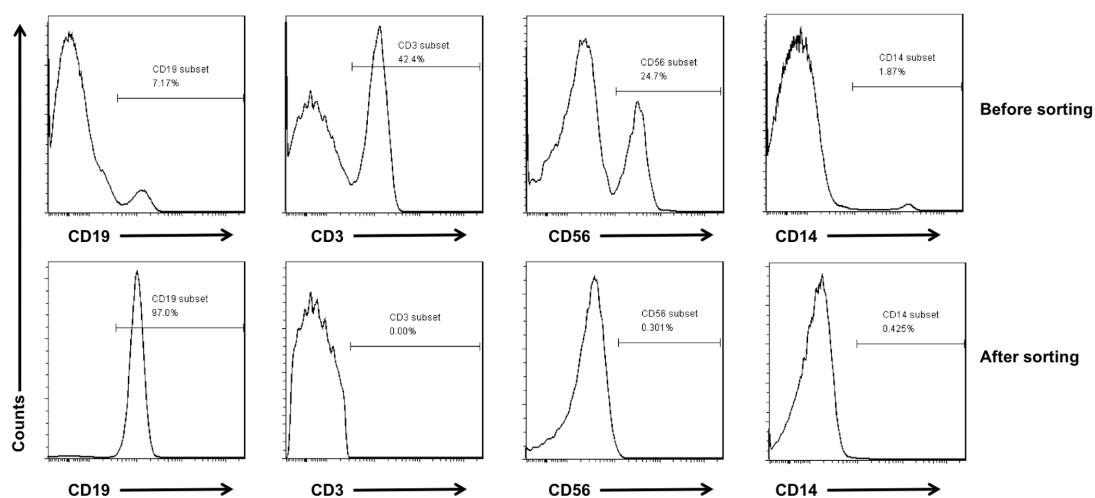

**Figure S1.** The purity analysis of FACS-sorted B cells. PBMCs were stained with anti-CD3 antibody, anti-CD56 antibody, anti-CD19 antibody and anti-CD14 antibody to exclude interference from other cell subsets, then the purity of the sorted cells was analyzed.
